# Supplementary material
Source: PubMed Central journal article supplement (PMC6336494)
Supplement: NIHMS1001087-supplement-Supplementary_data.pdf [file NIHMS1001087-supplement-Supplementary_data.pdf]

## Supplementary Information

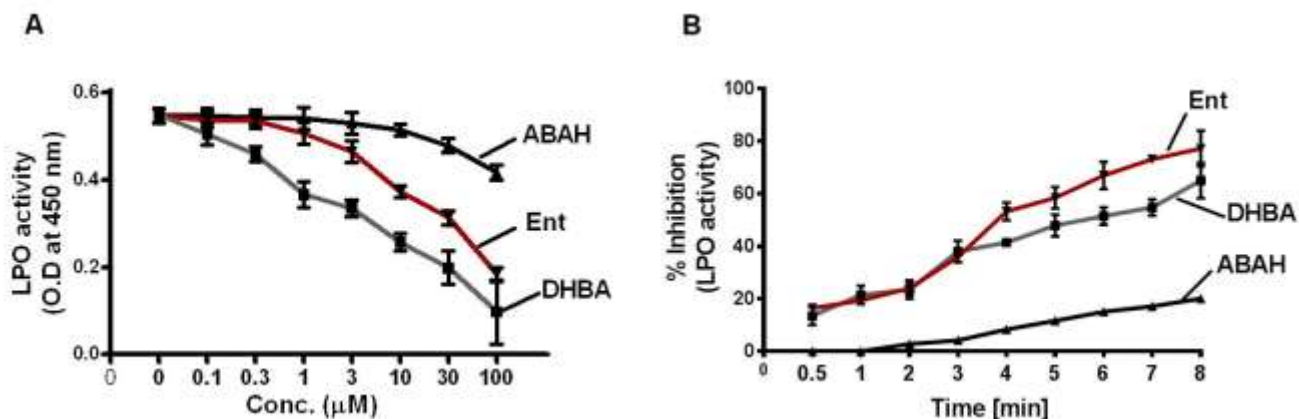

### Supplementary Figure 1. Ent inhibits LPO activity in a dose- and time-dependent fashion.

Various concentrations of Ent, DHBA or ABAH were pre-incubated for 10 min with LPO (50  $\mu\text{g}/\text{mL}$ ) at different time points, and LPO activity was measured using guaiacol (100 mM) and  $\text{H}_2\text{O}_2$  ( $6.7 \times 10^{-3}$ ). Line graph represents **A**) Dose response curve (0.1-100  $\mu\text{M}$ ) and **B**) Time kinetics (0.5-8 min) of LPO inhibition by 30  $\mu\text{M}$  of Ent, DHBA or ABAH. Results are expressed as mean  $\pm$  SEM and representative of 6 independent experiments.

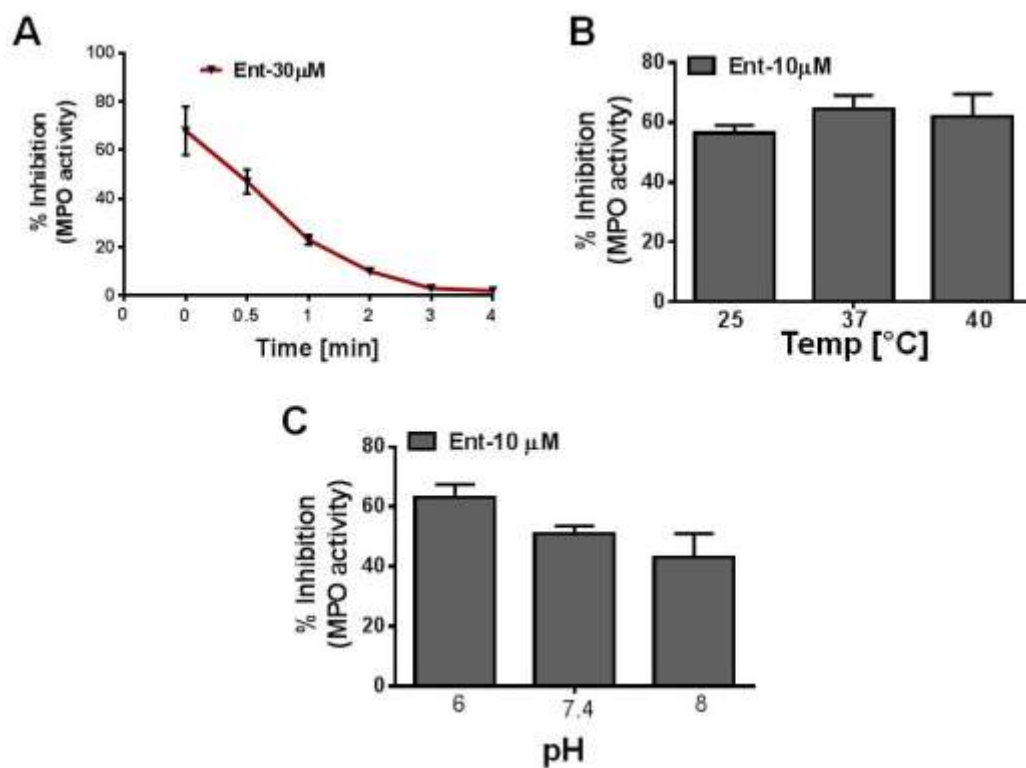

**Supplementary Figure 2. Ent inhibits ongoing MPO catalyzed reaction at a broad range of temperatures and pH.** A) Line graph represents % inhibition of MPO activity by Ent (30  $\mu\text{M}$ ) added at various time points after initiation of the MPO reaction. Bar graphs represent effect of B) temperature and C) pH on Ent-mediated MPO inhibition. Results are expressed as mean  $\pm$  SEM and representative of four independent experiments.

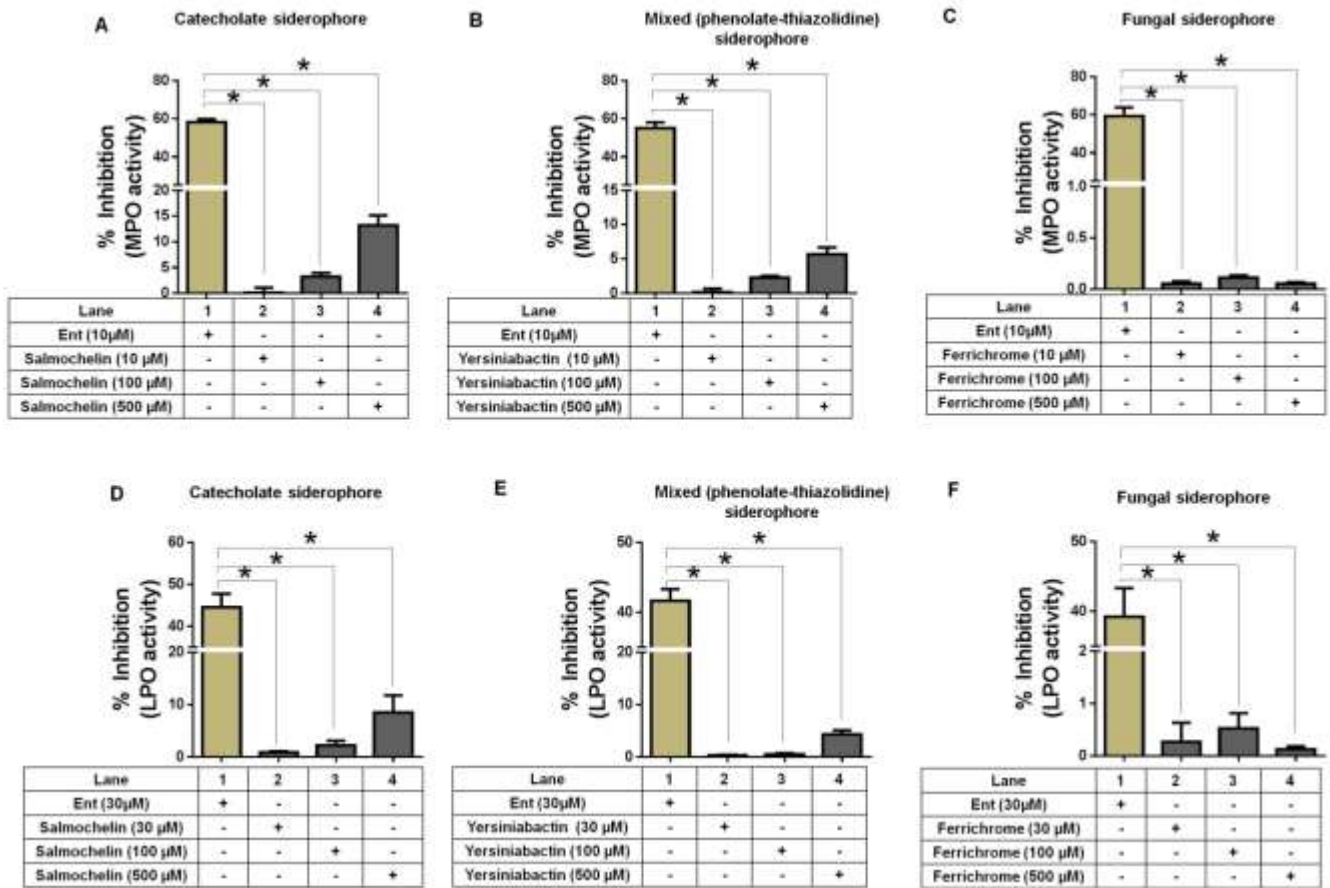

**Supplementary Figure 3. Non-catecholate siderophore failed to inhibit MPO activity.**

Various concentrations of Ent, Salmochelin and yersiniabactin were pre-incubated with MPO (100 mU) or LPO (50  $\mu$ g/mL) for 10 min and then enzyme activity was measured by 100mM guaiacol assay. **A-C)** Bar graphs represent % inhibition of MPO activity by **A)** Salmochelin, **B)** Yersiniabactin and **C)** Ferrichrome. **D-F)** Bar graphs represent % inhibition of LPO activity by **D)** Salmochelin, **E)** Yersiniabactin and **F)** Ferrichrome. Results are expressed as mean  $\pm$  SEM.

\* $p < 0.05$ , unpaired t test.

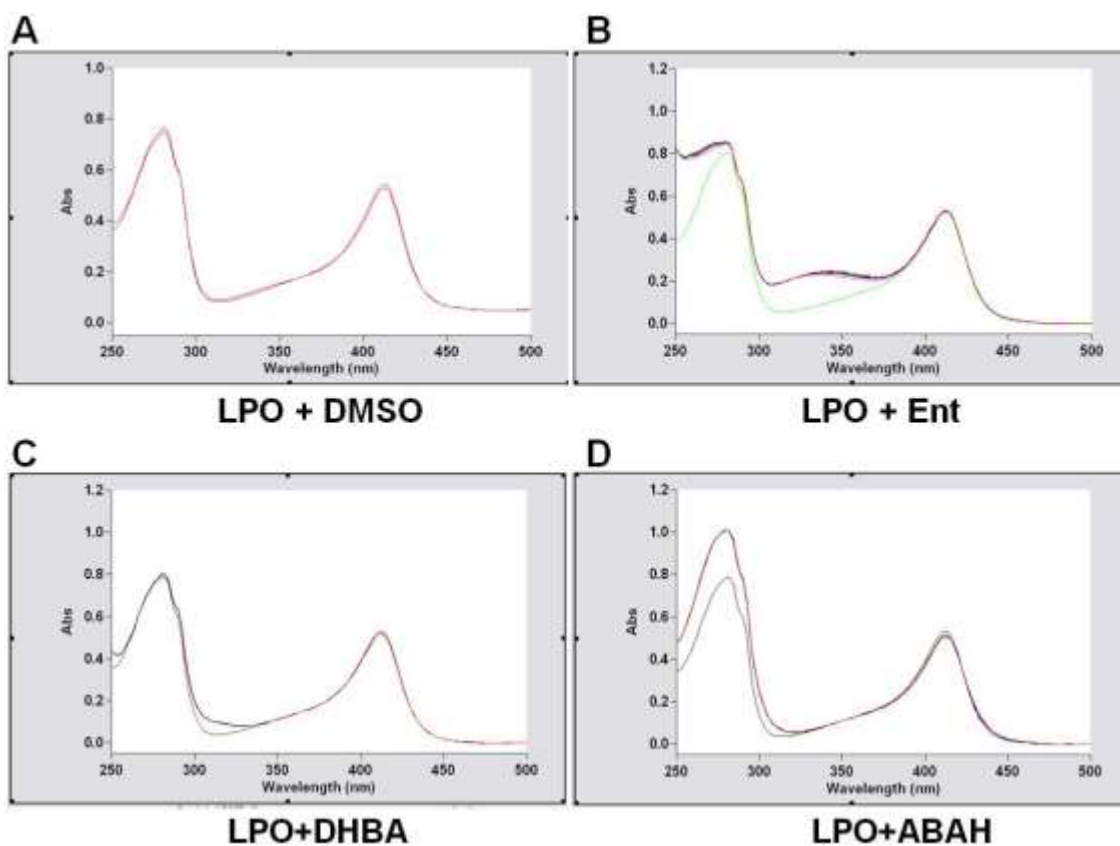

**Supplementary Figure 4. Ent, DHBA, and ABAH do not alter LPO spectra in absence of  $H_2O_2$ .** A-D) Spectral analysis of LPO (2.6 nM, in 0.1M phosphate buffer) was performed in presence of Ent (30  $\mu$ M), DHBA (30  $\mu$ M), or ABAH (30  $\mu$ M). The reaction was initiated by the addition of 30  $\mu$ M  $H_2O_2$ . Spectra (250-500 nm) were recorded up to 3 min. Each spectrum is an average of 3 scans taken in 1.0 second. Image displays the spectra of A) LPO + DMSO, B) LPO + Ent (30  $\mu$ M), C) LPO + DHBA (30  $\mu$ M) and D) LPO + ABAH.

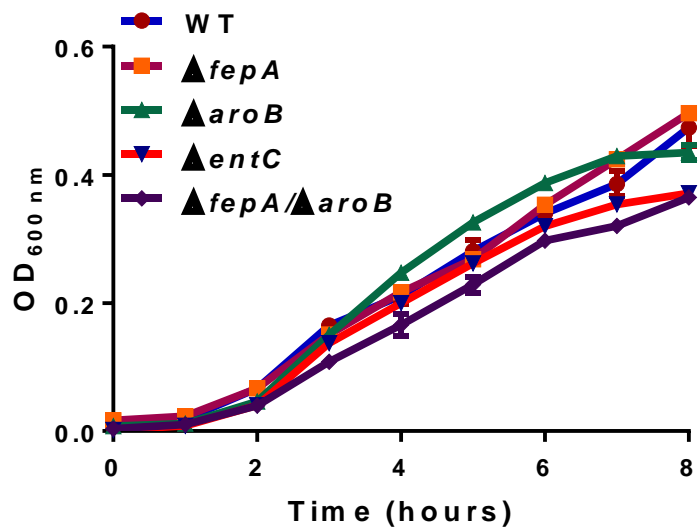

**Supplementary Figure 5. Growth of wild-type *E. coli* and its isogenic mutants were comparable in LB medium.** Bacterial cultures were grown overnight in LB media at 37°C. Subsequently, equal number of bacteria was grown in fresh LB media in triplicates and the OD<sub>600 nm</sub> was recorded at one hour interval.

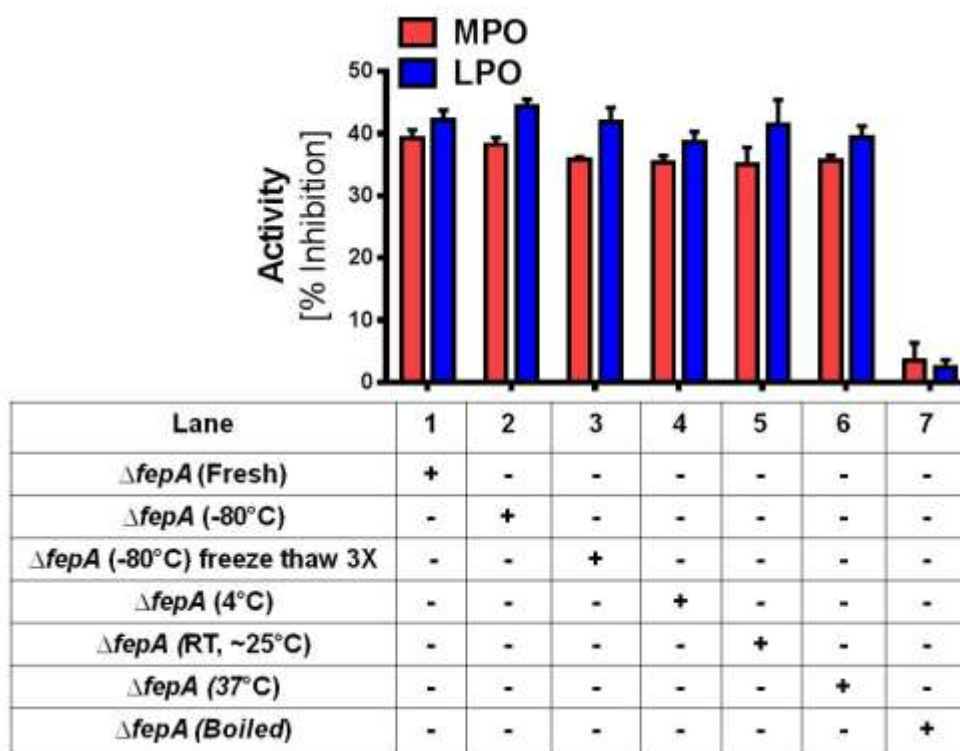

**Supplementary Figure 6. Ent-overproducing *E. coli* ( $\Delta fepA$ ) supernatant is stable at various temperatures except boiling.** Supernatant obtained from overnight grown  $\Delta fepA$  mutant were stored for 24h at -80°C, 4°C, room temperature (~25°C), and 37°C or freeze thawed three times or boiled for 5 min. Subsequently its MPO and LPO inhibitory activity was analyzed. Bar graph represents percent inhibition of MPO and LPO activity. Results are expressed as mean  $\pm$  SEM and representative of 3 independent experiments. \* $p < 0.05$ , unpaired t test.

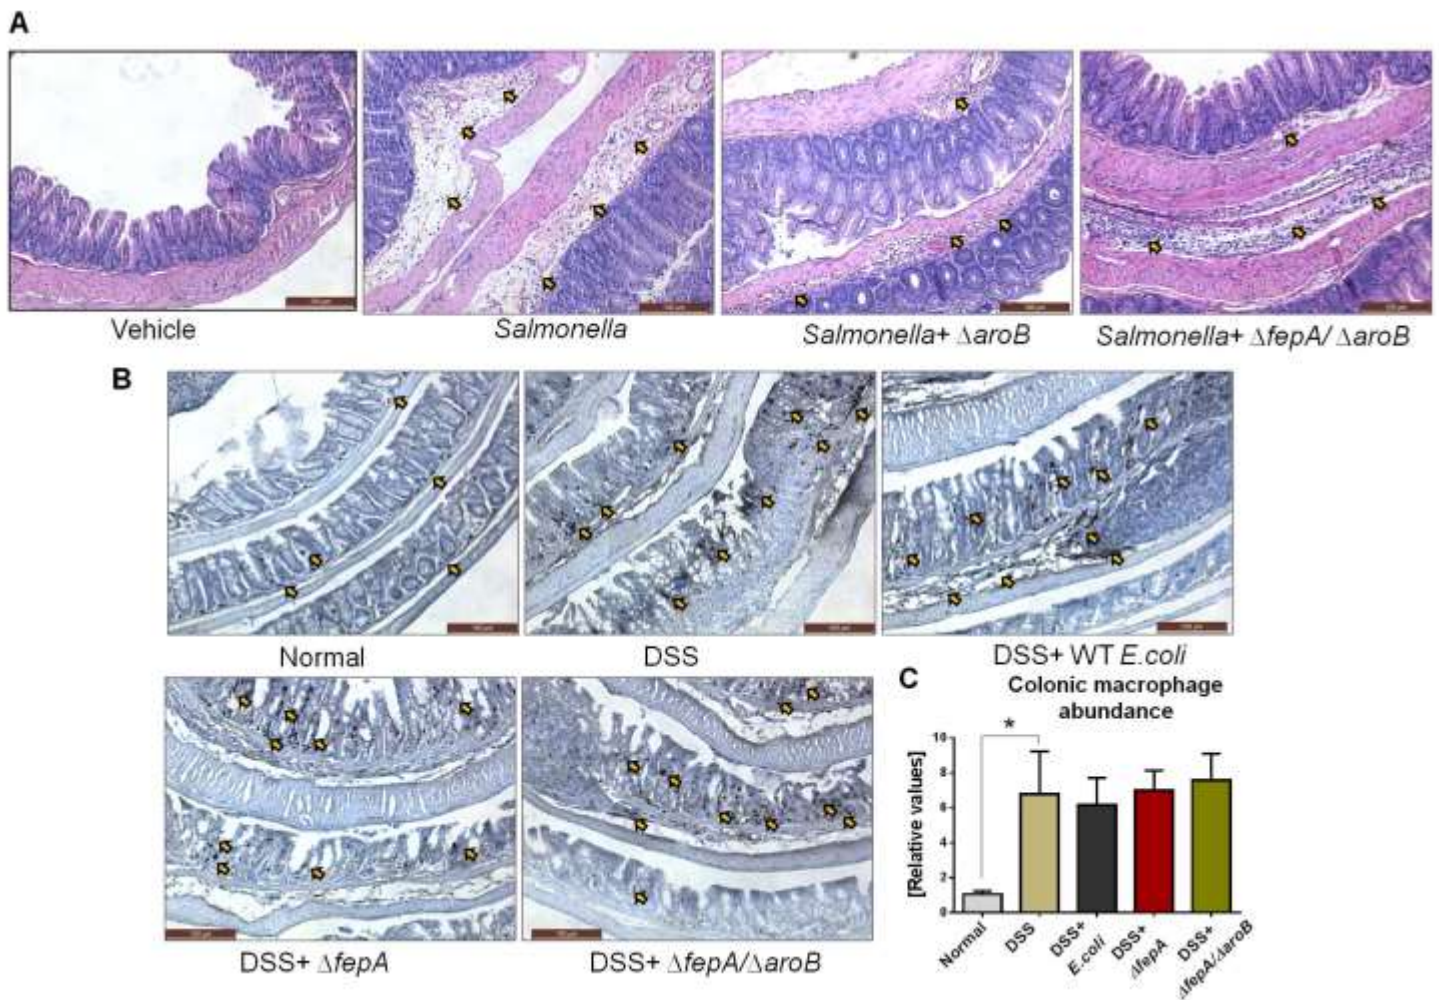

**Supplementary Figure 7. Experimental colitis remains unaltered in mice given Ent-overproducing *E. coli*.** Cecum and colon from *Salmonella*-induced gastroenteritis and DSS-induced colitis respectively subjected to H&E staining and immunohistochemistry. **A)** Representative images of hematoxylin and eosin stained sections obtained from the cecum of all groups. Arrows indicates the infiltration of immune cells. Scale bar = 100  $\mu$ m. **B)** Representative images of Swiss roll sections made from colon, immunostained with macrophage specific antibody F4/80. Arrows denote the macrophage infiltration in colonic tissue. Scale bar = 100

µm. The total number of F4/80 positive cells per slide was manually counted within a field viewed at 100X magnification under light microscope. C) Bar graph showing relative abundance of macrophages in control and treated group (n=5). All sections were photographed at 100X magnification with the same exposure time. Results are expressed as mean ± SEM. \*p<0.05, unpaired t test.

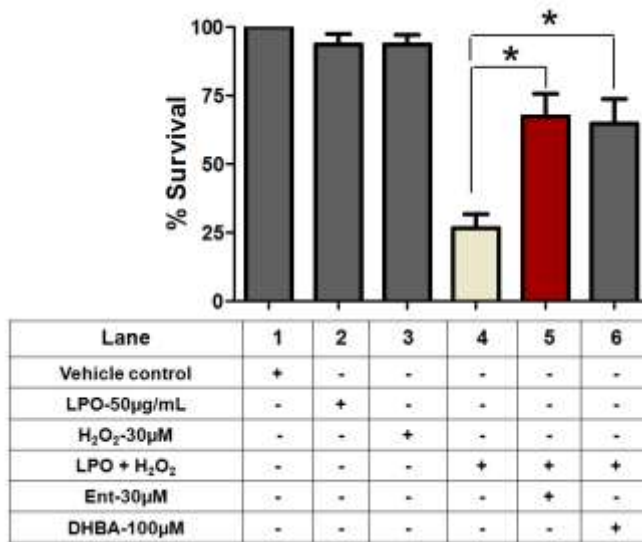

**Supplementary Figure 8. Ent rescues LPO-H<sub>2</sub>O<sub>2</sub>-mediated bacterial killing *in vitro*.** WT *E. coli* grown in LB medium were re-suspended in PBS and then incubated with LPO (50 µg/mL) and H<sub>2</sub>O<sub>2</sub> (30 µM) with or without Ent or DHBA for 30 min. Bar graph represents % survival of WT *E. coli*. Results are expressed as mean ± SEM and representative of 3 independent experiments. \*p< 0.05, unpaired t test.
